# Supplementary material for: Galectin-3 interacts with components of the nuclear ribonucleoprotein complex
Source: PubMed Central journal article supplement (PMC4952364; doi:10.1186/s12885-016-2546-0), 2016-07-19
Supplement: 12885_2016_2546_MOESM1_ESM.pdf [file 12885_2016_2546_MOESM1_ESM.pdf]

Table S1. Galectin-3 interacting partners.

|    | Identifier | Mw KDa | Number of peptides | number of proteins | coverage (%) | Description                                                            |
|----|------------|--------|--------------------|--------------------|--------------|------------------------------------------------------------------------|
| 1  | 13654237   | 468,8  | 71                 | 15                 | 25,68        | DNA-dependent protein kinase catalytic subunit isoform1 (DNPK1)        |
| 2  | 119591368  | 58,5   | 17                 | 15                 | 40,49        | nucleolin, isoform CRA_C (Ncl)                                         |
| 3  | 157412270  | 73,6   | 15                 | 17                 | 36,18        | hnRNPM isoform b                                                       |
| 4  | 14043072   | 37,4   | 13                 | 9                  | 44,19        | hnRNPA2B1 isoform B1                                                   |
| 5  | 75517570   | 29,4   | 12                 | 41                 | 41,2         | hnRNPA1                                                                |
| 6  | 154355000  | 73,1   | 11                 | 15                 | 23,07        | far upstream element-binding protein 2                                 |
| 7  | 24234750   | 95,3   | 11                 | 48                 | 20,36        | interleukin enhancer-binding factor 3 isoform a                        |
| 8  | 100913206  | 140,9  | 11                 | 15                 | 11,97        | ATP-dependent RNA helicase A                                           |
| 9  | 157694492  | 148,8  | 10                 | 13                 | 12,58        | myb-binding protein 1A isoform 2                                       |
| 10 | 19913410   | 99,3   | 10                 | 24                 | 23,85        | major vault protein                                                    |
| 11 | 24234686   | 53,5   | 10                 | 80                 | 24,54        | heat shock cognate 71 kDa protein isoform 2                            |
| 12 | 126032350  | 465,2  | 9                  | 12                 | 3,27         | DNA-dependent protein kinase catalytic subunit isoform2                |
| 13 | 14165466   | 57,2   | 9                  | 15                 | 34,65        | polypyrimidine tract-binding protein 1 isoform c (PTBP1)               |
| 14 | 5031877    | 66,4   | 8                  | 8                  | 20,99        | lamin B1                                                               |
| 15 | 40353734   | 29,4   | 8                  | 34                 | 46,04        | nucleophosmin isoform 2                                                |
| 16 | 4507555    | 75,4   | 8                  | 8                  | 18,3         | thymopoietin isoform alpha                                             |
| 17 | 4507943    | 123,3  | 8                  | 16                 | 12,7         | exportin-1                                                             |
| 18 | 5031753    | 49,2   | 8                  | 29                 | 27,84        | hnRNPH                                                                 |
| 19 | 211828181  | 61,9   | 8                  | 9                  | 31,12        | hnRNPL                                                                 |
| 20 | 116283697  | 50,6   | 8                  | 20                 | 26,49        | SYNCRIP (hnRNPOQ)                                                      |
| 21 | 4505773    | 29,8   | 7                  | 12                 | 45,59        | prohibitin                                                             |
| 22 | 33875177   | 29,4   | 7                  | 17                 | 41,73        | YBX1 protein, partial                                                  |
| 23 | 5729877    | 70,9   | 7                  | 60                 | 15,33        | heat shock cognate 71 kDa protein isoform 1                            |
| 24 | 4885381    | 22,6   | 6                  | 2                  | 22,57        | histone H1.5                                                           |
| 25 | 4503101    | 20,9   | 6                  | 3                  | 45,6         | cysteine and glycine-rich protein 2                                    |
| 26 | 40254924   | 34,9   | 6                  | 1                  | 30,62        | leucin-rich repeat-containing protein 59                               |
| 27 | 120587023  | 318,2  | 6                  | 5                  | 3,3          | small subunit processome component 20 homolog                          |
| 28 | 4826760    | 45,6   | 6                  | 5                  | 31,08        | hnRNPF                                                                 |
| 29 | 4504447    | 36     | 6                  | 8                  | 24,63        | hnRNPA2B1 isoform A2                                                   |
| 30 | 111494085  | 67,8   | 6                  | 14                 | 15,32        | hnRNPR                                                                 |
| 31 | 30795231   | 22,7   | 5                  | 4                  | 52,42        | brain acid soluble protein 1 (BASP1)                                   |
| 32 | 4885375    | 21,4   | 5                  | 13                 | 24,41        | histone H1.2                                                           |
| 33 | 49257460   | 33,3   | 5                  | 9                  | 28           | PTRF protein                                                           |
| 34 | 224586882  | 40,1   | 5                  | 16                 | 20,7         | DNA-binding protein A isoform a (YBX3)                                 |
| 35 | 4504517    | 22,8   | 5                  | 10                 | 40           | heat shock protein beta-1                                              |
| 36 | 9624998    | 49,2   | 5                  | 6                  | 18,26        | hnRNPH2                                                                |
| 37 | 91208426   | 273,4  | 5                  | 12                 | 3            | pre-mRNA-splicing factor 8 (PRPF8)                                     |
| 38 | 54112117   | 145,7  | 5                  | 5                  | 5,06         | SF3B1 isoform 1                                                        |
| 39 | 55956921   | 30,6   | 5                  | 23                 | 15,79        | hnRNPAB isoform b                                                      |
| 40 | 5031875    | 65,1   | 4                  | 25                 | 12,06        | lamin isoform c                                                        |
| 41 | 433344     | 31,5   | 4                  | 40                 | 15,73        | p37 AUF 1                                                              |
| 42 | 13128860   | 55,1   | 4                  | 15                 | 11,41        | histone deacetylase 1 (HDAC1)                                          |
| 43 | 21626466   | 94,6   | 4                  | 18                 | 8,5          | matrin-3 isoform a                                                     |
| 44 | 300934782  | 97,3   | 4                  | 12                 | 6,17         | transportin-3 isoform 2                                                |
| 45 | 119573569  | 98,7   | 4                  | 22                 | 5,64         | adenosine deaminase, RNA-specific, isoform CRA_b (ADAR)                |
| 46 | 62955803   | 195,9  | 4                  | 11                 | 3,26         | nucleoporin Nup 188 homolog                                            |
| 47 | 295054210  | 271,5  | 4                  | 10                 | 2,78         | telomere-associated protein RIF1 isoform 2 (RIF1)                      |
| 48 | 301171475  | 71,3   | 4                  | 14                 | 8,36         | DDX3X isoform 3                                                        |
| 49 | 4502491    | 31,3   | 4                  | 10                 | 29,08        | SF2P32                                                                 |
| 50 | 21536301   | 83     | 3                  | 13                 | 6,18         | signal transducer & activator of transcription 1-isoform beta (STAT1)  |
| 51 | 338753429  | 79,8   | 3                  | 9                  | 5,6          | nuclear pore complex protein Nup93 isoform 2                           |
| 52 | 148596949  | 73,6   | 3                  | 6                  | 5,15         | nucleolar and coiled-body phosphoprotein 1 (NOLC1)                     |
| 53 | 11225260   | 90,7   | 3                  | 19                 | 4,84         | DNA-topoisomerase 1                                                    |
| 54 | 4504981    | 14,7   | 3                  | 11                 | 42,22        | galectin-1                                                             |
| 55 | 48429165   | 26,9   | 3                  | 5                  | 26,85        | Tho4                                                                   |
| 56 | 118582269  | 22,4   | 3                  | 11                 | 26,37        | serine/arginine-rich splicing factor 1 isoform 2 (SRSF1)               |
| 57 | 52632385   | 50,5   | 3                  | 9                  | 14,47        | hnRNPL isoform b                                                       |
| 58 | 197692223  | 53,1   | 3                  | 12                 | 11,68        | U2 auxiliary factor 2 isoform b (U2AF65)                               |
| 59 | 119620769  | 15,2   | 3                  | 10                 | 30,3         | splicing factor, arginine/serine-rich 7, 35 kDa, isoform CRA_b (SRSF7) |
| 60 | 10800138   | 13,9   | 2                  | 31                 | 19,05        | histone H2B type 1-D                                                   |
| 61 | 4758302    | 12,3   | 2                  | 2                  | 30,77        | enhancer of rudimentary homolog (ERH)                                  |

|    |           |       |   |    |       |                                                                    |
|----|-----------|-------|---|----|-------|--------------------------------------------------------------------|
| 62 | 83641870  | 28,4  | 2 | 27 | 16,22 | nucleophosmin isoform 3                                            |
| 63 | 4506007   | 37    | 2 | 33 | 9,29  | ser/thr-phosphatase PP1-gamma catalytic subunit isoform 1 (PPP1CC) |
| 64 | 5453555   | 24,4  | 2 | 14 | 8,8   | GTP-binding nuclear protein Ran                                    |
| 65 | 4507353   | 61,5  | 2 | 20 | 6,96  | TATA-binding protein-associated factor 2N isoform 2 (TAF15)        |
| 66 | 4758844   | 148,9 | 2 | 7  | 1,58  | nuclear pore complex protein Nup155 isoform 2                      |
| 67 | 5174449   | 22,5  | 2 | 2  | 10,33 | histone H1x                                                        |
| 68 | 4504433   | 10,7  | 2 | 4  | 19,79 | high mobility group protein HMG-1/HMG-Y isoform b (HMGA1)          |
| 69 | 4504183   | 23,3  | 2 | 27 | 18,57 | glutathione S-transferase P                                        |
| 70 | 13376840  | 33,6  | 2 | 7  | 12,13 | WD repeat-containing protein 61 (WDR61)                            |
| 71 | 296439283 | 227,8 | 2 | 9  | 1,29  | nuclear pore complex protein Nup205                                |
| 72 | 40217847  | 244,4 | 2 | 13 | 1,59  | U5 200 kDa (snRNP200)                                              |
| 73 | 7657381   | 55,1  | 2 | 2  | 7,54  | PRP 19                                                             |
| 74 | 402794208 | 54    | 2 | 17 | 7,62  | PUF60 isoform h                                                    |
| 75 | 7661920   | 46,8  | 2 | 26 | 9,98  | eIF4A3                                                             |
| 76 | 197692189 | 27,9  | 2 | 5  | 12,92 | U2 auxiliary factor 1 isoform a (U2AF35)                           |
| 77 | 4504517   | 22,8  | 2 | 9  | 13,17 | HspB1                                                              |
| 78 | 345197228 | 21,9  | 2 | 11 | 19,15 | Tra2B isoform 2                                                    |
| 79 | 119577432 | 84,4  | 2 | 12 | 4,65  | hnRNP U-like 1, isoform CRA_c                                      |
| 80 | 39753957  | 66,2  | 1 | 7  | 2,06  | torsin-1A-interacting protein 1 isoform 2                          |
| 81 | 13775200  | 10,1  | 1 | 1  | 17,44 | SF3B5                                                              |
| 82 | 31455228  | 19,8  | 1 | 5  | 10,78 | U2 auxiliary factor 1 (U2AF35)                                     |
| 83 | 4507129   | 10,8  | 1 | 4  | 11,96 | small nuclear ribonucleoprotein E (SmE)                            |
| 84 | 5803036   | 30,8  | 1 | 2  | 6,56  | hnRNPA0                                                            |

Binding partners of galectin-3 were eluted with lactose from a galectin-3/sepharose column and analyzed by mass spectrometry. Galectin-3 interacting proteins verified by co-immunoprecipitation and immunofluorescence analysis are indicated in red. Other hnRNPs are depicted in blue and components of the spliceosome in green.
