# Supplementary material for: Galectin-3 interacts with components of the nuclear ribonucleoprotein complex
Source: PubMed Central journal article supplement (PMC4952364; doi:10.1186/s12885-016-2546-0), 2016-07-19
Supplement: 12885_2016_2546_MOESM4_ESM.pdf [file 12885_2016_2546_MOESM4_ESM.pdf]

**Table S2. Differentially spliced mRNAs following galectin-3 depletion.**

| <b>stable_id</b> | <b>padj</b> | <b>transcripts</b> | <b>gene name</b> |
|------------------|-------------|--------------------|------------------|
| ENSG0000005893   | 0,02173585  | ENST00000540603    | LAMP2            |
| ENSG00000022840  | 0,0498587   | ENST00000537376    | RNF10            |
| ENSG00000047315  | 0,03048084  | ENST00000381227    | POLR2B           |
| ENSG00000047315  | 0,00960713  | ENST00000381227    | POLR2B           |
| ENSG00000054523  | 0,0064032   | ENST00000497835    | KIF1B            |
| ENSG00000063046  | 0,01240177  | ENST00000550390    | EIF4B            |
| ENSG00000063177  | 0,00271401  | ENST00000550671    | RPL18            |
| ENSG00000063177  | 0,00606828  | ENST00000550671    | RPL18            |
| ENSG00000070756  | 0,02128759  | ENST00000517990    | PABPC1           |
| ENSG00000071564  | 0,00447609  | ENST00000586164    | TCF3             |
| ENSG00000072042  | 0,01322597  | ENST00000557331    | RDH11            |
| ENSG00000075624  | 0,0163336   | ENST00000425660    | ACTB             |
| ENSG00000078304  | 0,03281571  | ENST00000556493    | PPP2R5C          |
| ENSG00000079841  | 0,01117241  | ENST00000517433    | RIMS1            |
| ENSG00000079841  | 0,00830955  | ENST00000517433    | RIMS1            |
| ENSG00000079841  | 0,01780655  | ENST00000517433    | RIMS1            |
| ENSG00000079841  | 0,0069257   | ENST00000517433    | RIMS1            |
| ENSG00000081181  | 0,00060702  | ENST00000557120    | ARG2             |
| ENSG00000087077  | 0,00189214  | ENST00000437505    | TRIP6            |
| ENSG00000089157  | 0,00387036  | ENST00000546989    | RPLP0            |
| ENSG00000089157  | 0,03040067  | ENST00000546989    | RPLP0            |
| ENSG00000089157  | 0,01981512  | ENST00000546989    | RPLP0            |
| ENSG00000089157  | 0,02445019  | ENST00000546989    | RPLP0            |
| ENSG00000092853  | 0,03348098  | ENST00000520551    | CLSPN            |
| ENSG00000096746  | 4,95E-08    | ENST00000354695    | HNRNPH3          |
| ENSG00000089157  | 1,48E-05    | ENST00000546989    | RPLP0            |
| ENSG00000089157  | 2,08E-06    | ENST00000546989    | RPLP0            |
| ENSG00000099622  | 0,01989357  | ENST00000590171    | CIRBP            |
| ENSG00000103018  | 0,0017749   | ENST00000512062    | CYB5B            |
| ENSG00000105968  | 0,00243361  | ENST00000381124    | H2AFV            |
| ENSG00000108788  | 5,56E-07    | ENST00000590050    | MLX              |
| ENSG00000109475  | 0,01894095  | ENST00000394668    | RPL34            |
| ENSG00000109475  | 0,0163336   | ENST00000394668    | RPL34            |
| ENSG00000109475  | 2,37E-12    | ENST00000394668    | RPL34            |
| ENSG00000109685  | 1,66E-06    | ENST00000382895    | WHSC1            |
| ENSG00000109861  | 0,04115452  | ENST00000529974    | CTSC             |
| ENSG00000111640  | 0,0163336   | ENST00000229239    | GAPDH            |
| ENSG00000112245  | 9,37E-05    | ENST00000578299    | PTP4A1           |
| ENSG00000113552  | 0,04627731  | ENST00000504139    | GNPDA1           |
| ENSG00000115252  | 0,03846657  | ENST00000358139    | PDE1A            |
| ENSG00000117868  | 0,02291362  | ENST00000435514    | ESYT2            |
| ENSG00000113719  | 0,03999813  | ENST00000519796    | ERGIC1           |
| ENSG00000119048  | 0,02173585  | ENST00000511807    | UBE2B            |
| ENSG00000119335  | 9,64E-05    | ENST00000480217    | SET              |
| ENSG00000120256  | 0,04005437  | ENST00000463728    | LRP11            |
| ENSG00000120685  | 0,01117241  | ENST00000602899    | PROSER1          |
| ENSG00000120685  | 0,00274453  | ENST00000602899    | PROSER1          |

|                 |            |                 |          |
|-----------------|------------|-----------------|----------|
| ENSG00000123080 | 0,00030463 | ENST00000371761 | CDKN2C   |
| ENSG00000124243 | 0,00089011 | ENST00000485049 | BCAS4    |
| ENSG00000127540 | 0,00541498 | ENST00000589880 | UQCR11   |
| ENSG00000129625 | 0,00319942 | ENST00000504247 | REEP5    |
| ENSG00000130558 | 0,00023207 | ENST00000539529 | OLFM1    |
| ENSG00000130558 | 0,01884108 | ENST00000539529 | OLFM1    |
| ENSG00000130826 | 0,01622641 | ENST00000475966 | DKC1     |
| ENSG00000131069 | 0,04285654 | ENST00000480978 | ACSS2    |
| ENSG00000131470 | 0,00153715 | ENST00000589505 | PSMC3IP  |
| ENSG00000131473 | 0,04537347 | ENST00000590770 | ACLY     |
| ENSG00000132199 | 4,82E-05   | ENST00000578647 | ENOSF1   |
| ENSG00000132341 | 0,00014559 | ENST00000464211 | RAN      |
| ENSG00000132846 | 0,00830955 | ENST00000505685 | ZBED3    |
| ENSG00000133112 | 0,01045759 | ENST00000533567 | TPT1     |
| ENSG00000134748 | 0,02072701 | ENST00000487160 | PRPF38A  |
| ENSG00000136938 | 0,00086202 | ENST00000486769 | ANP32B   |
| ENSG00000138035 | 0,03230769 | ENST00000260604 | PNPT1    |
| ENSG00000138326 | 0,0163336  | ENST00000465692 | RPS24    |
| ENSG00000138326 | 0,02699893 | ENST00000465692 | RPS24    |
| ENSG00000142089 | 0,03407771 | ENST00000526811 | IFITM3   |
| ENSG00000142541 | 0,00197168 | ENST00000472481 | RPL13A   |
| ENSG00000142541 | 0,04568049 | ENST00000472481 | RPL13A   |
| ENSG00000142676 | 0,04537347 | ENST00000482370 | RPL11    |
| ENSG00000143641 | 0,00711084 | ENST00000366672 | GALNT2   |
| ENSG00000145592 | 0,04797616 | ENST00000504562 | RPL37    |
| ENSG00000145592 | 0,03281571 | ENST00000504562 | RPL37    |
| ENSG00000145730 | 0,00098568 | ENST00000506260 | PAM      |
| ENSG00000147687 | 0,00192782 | ENST00000522810 | TATDN1   |
| ENSG00000149136 | 0,02406436 | ENST00000526696 | SSRP1    |
| ENSG00000149925 | 0,00192782 | ENST00000562679 | ALDOA    |
| ENSG00000149925 | 0,04446963 | ENST00000562679 | ALDOA    |
| ENSG00000155755 | 0,00169529 | ENST00000286196 | TMEM237  |
| ENSG00000159131 | 0,04209808 | ENST00000441403 | GART     |
| ENSG00000160991 | 0,024743   | ENST00000488996 | ORAI2    |
| ENSG00000161010 | 0,01240177 | ENST00000520698 | C5orf45  |
| ENSG00000161960 | 0,03407771 | ENST00000581384 | EIF4A1   |
| ENSG00000161970 | 0,04603954 | ENST00000584164 | RPL26    |
| ENSG00000161970 | 0,03021406 | ENST00000584164 | RPL26    |
| ENSG00000161970 | 0,03368222 | ENST00000584164 | RPL26    |
| ENSG00000161970 | 0,02927271 | ENST00000584164 | RPL26    |
| ENSG00000163291 | 0,03394755 | ENST00000512299 | PAQR3    |
| ENSG00000163597 | 2,65E-07   | ENST00000493536 | SNHG16   |
| ENSG00000163946 | 0,03394755 | ENST00000478052 | FAM208A  |
| ENSG00000164032 | 0,0230666  | ENST00000529158 | H2AFZ    |
| ENSG00000164855 | 0,00456324 | ENST00000449955 | TMEM184A |
| ENSG00000165609 | 0,03342627 | ENST00000378927 | NUDT5    |
| ENSG00000166130 | 0,01488349 | ENST00000420861 | IKBIP    |
| ENSG00000166164 | 0,0019218  | ENST00000475877 | BRD7     |
| ENSG00000166441 | 0,00086202 | ENST00000314138 | RPL27A   |
| ENSG00000166441 | 0,03092736 | ENST00000314138 | RPL27A   |

|                 |            |                 |               |
|-----------------|------------|-----------------|---------------|
| ENSG00000166741 | 0,00023309 | ENST00000542647 | NNMT          |
| ENSG00000167526 | 0,02173585 | ENST00000472354 | RPL13         |
| ENSG00000167526 | 0,00189436 | ENST00000472354 | RPL13         |
| ENSG00000167526 | 0,00024114 | ENST00000472354 | RPL13         |
| ENSG00000167552 | 0,01780655 | ENST00000295766 | TUBA1A        |
| ENSG00000167552 | 0,00619385 | ENST00000295766 | TUBA1A        |
| ENSG00000168542 | 0,01462764 | ENST00000467886 | COL3A1        |
| ENSG00000168610 | 0,04561908 | ENST00000588065 | STAT3         |
| ENSG00000169851 | 0,03758912 | ENST00000361762 | PCDH7         |
| ENSG00000169955 | 1,48E-05   | ENST00000252799 | ZNF747        |
| ENSG00000173442 | 0,01061915 | ENST00000533237 | EHBP1L1       |
| ENSG00000173786 | 0,00086202 | ENST00000393888 | CNP           |
| ENSG00000175061 | 0,03048084 | ENST00000580180 | C17orf76-AS1  |
| ENSG00000177954 | 0,00016062 | ENST00000392558 | RPS27         |
| ENSG00000182054 | 0,03348098 | ENST00000559482 | IDH2          |
| ENSG00000182372 | 0,00197168 | ENST00000524258 | CLN8          |
| ENSG00000184014 | 0,01240177 | ENST00000529977 | DENND5A       |
| ENSG00000187109 | 0,00185846 | ENST00000552147 | NAP1L1        |
| ENSG00000187109 | 0,01117241 | ENST00000552147 | NAP1L1        |
| ENSG00000187260 | 0,03394755 | ENST00000334493 | WDR86         |
| ENSG00000187514 | 1,48E-05   | ENST00000341369 | PTMA          |
| ENSG00000188343 | 0,00084753 | ENST00000522803 | FAM92A1       |
| ENSG00000188846 | 0,03348098 | ENST00000416518 | RPL14         |
| ENSG00000188846 | 0,04754824 | ENST00000416518 | RPL14         |
| ENSG00000188895 | 0,04115452 | ENST00000581246 | MSL1          |
| ENSG00000189306 | 0,00711084 | ENST00000483303 | RRP7A         |
| ENSG00000196428 | 0,03696615 | ENST00000480589 | TSC22D2       |
| ENSG00000197111 | 0,04710537 | ENST00000548933 | PCBP2         |
| ENSG00000197111 | 0,00959888 | ENST00000548933 | PCBP2         |
| ENSG00000198755 | 0,01117241 | ENST00000464112 | RPL10A        |
| ENSG00000205542 | 0,00218405 | ENST00000380636 | TMSB4X        |
| ENSG00000205542 | 0,04539845 | ENST00000380636 | TMSB4X        |
| ENSG00000211448 | 0,00551967 | ENST00000553594 | DIO2          |
| ENSG00000211460 | 0,04115452 | ENST00000536142 | TSN           |
| ENSG00000213923 | 0,00020474 | ENST00000451964 | CSNK1E        |
| ENSG00000213923 | 0,0230666  | ENST00000451964 | CSNK1E        |
| ENSG00000213923 | 0,00456324 | ENST00000451964 | CSNK1E        |
| ENSG00000214182 | 0,04115452 | ENST00000607242 | PTMAP5        |
| ENSG00000221983 | 0,00052147 | ENST00000595683 | UBA52         |
| ENSG00000242259 | 0,03048084 | ENST00000509549 | C22orf39      |
| ENSG00000245532 | 0,00122219 | ENST00000601801 | NEAT1         |
| ENSG00000250232 | 0,01989357 | ENST00000376358 | AF196779.12   |
| ENSG00000258891 | 0,04568049 | ENST00000555916 | RP5-1021120.5 |
| ENSG00000258964 | 0,04603954 | ENST00000555937 | RP11-618G20.1 |
| ENSG00000260916 | 0,01583578 | ENST00000569205 | CCPG1         |
| ENSG00000261459 | 0,03345417 | ENST00000569360 | ZNF747        |
| ENSG00000263809 | 0,03281571 | ENST00000582471 | RP11-849F2.7  |
| ENSG00000265500 | 0,0230666  | ENST00000579777 | SEN3-EIF4A1   |
| ENSG00000265500 | 0,04590137 | ENST00000579777 | SEN3-EIF4A1   |
| ENSG00000265500 | 0,01117241 | ENST00000579777 | SEN3-EIF4A1   |

|                 |            |                 |             |
|-----------------|------------|-----------------|-------------|
| ENSG00000265500 | 0,0185882  | ENST00000579777 | SEN3-EIF4A1 |
| ENSG00000266658 | 0,00029035 | ENST00000579027 | RNA28S5     |
| ENSG00000268083 | 0,03646614 | ENST00000594769 | AC104534.3  |
| ENSG00000268083 | 0,02817458 | ENST00000594769 | AC104534.3  |
| ENSG00000268173 | 0,00154597 | ENST00000593731 | PIK3R2      |
| ENSG00000268173 | 0,00897405 | ENST00000593731 | PIK3R2      |
| ENSG00000268173 | 0,03457181 | ENST00000593731 | PIK3R2      |
| ENSG00000268173 | 0,00154597 | ENST00000593731 | PIK3R2      |
| ENSG00000268173 | 5,91E-06   | ENST00000593731 | PIK3R2      |
| ENSG00000268173 | 1,48E-05   | ENST00000593731 | PIK3R2      |
| ENSG00000268173 | 0,00041371 | ENST00000593731 | PIK3R2      |
| ENSG00000268173 | 2,45E-05   | ENST00000593731 | PIK3R2      |
| ENSG00000268173 | 0,01932015 | ENST00000593731 | PIK3R2      |
| ENSG00000270800 | 0,04627731 | ENST00000605528 | RPS10-NUDT3 |

Transcripts showing differently spliced mRNAs in galectin-3-silenced HeLa cells in comparison to the non-silenced luciferase control using DEXseq (padj  $\leq$  0.05).
